# Supplementary material for: Explaining the influence of the introduced base sites into alkali oxide modified CsX towards side-chain alkylation of toluene with methanol
Source: Royal Society of Chemistry journal article supplement (doi:10.1039/c9ra01798d), 2019-01-01
Supplement: c9ra01798d1.pdf [file c9ra01798d1.pdf]

## Supporting information

# Explaining the Influence of the Introduced Base Sites into Alkali Oxides modified CsX towards Side-chain Alkylation of Toluene with Methanol

Peidong Li<sup>abc</sup>, Qiao Han<sup>abc</sup>, Xiaomin Zhang<sup>b</sup>, Yangyang Yuan<sup>b</sup>, Yanfei Zhang<sup>abc</sup>, Li Xu<sup>b</sup>, Hongchen Guo<sup>\*a</sup> and Lei Xu<sup>\*b</sup>

- State Key Laboratory of Fine Chemicals & School of Chemical Engineering, Dalian University of Technology, Dalian 116024, People's Republic of China. E-mail: hongchenguo@dlut.edu.cn
- National Laboratory for Clean Energy, Dalian Institute of Chemical Physics, Chinese Academy of Sciences, Dalian 116023, People's Republic of China. E-mail: leixu@dicp.ac.cn
- University of Chinese Academy of Sciences, Beijing 100049, People's Republic of China.

**Fig. S1** The  $V_{\text{micro}}$  of the CsX-c modified with different cesium oxide amount as function of the cesium oxide loading amount.

**Fig. S2.** (a)  $\text{NH}_3$ -TPD and (b) FT-IR of adsorbed  $\text{NH}_3$  of the indicated catalysts.

**Fig. S3** the comparison of  $\text{CO}_2$ -TPD curves of the indicated catalysts with similar  $S_{\text{int}}$ .

**Table S1** The textural structure properties of CsX-c with different cesium oxide amount.

**Table S2** The composition and base properties of the indicated catalysts.

**Table S3** The reaction behaviors of alkylation of toluene with methanol over the indicated catalysts.

**Table S1** The textural structure properties of CsX-c with different cesium oxide amount.

| Catalysts                                                  | CsX-c <sup>1</sup> | 4CsOx/CsX-c | 8CsOx/CsX-c | 12CsOx/CsX-c | 16CsOx/CsX-c |
|------------------------------------------------------------|--------------------|-------------|-------------|--------------|--------------|
| $S_{\text{BET}}$ ( $\text{m}^2/\text{g}$ )                 | 542.20             | 468.50      | 398.34      | 356.28       | 295.60       |
| $V_{\text{micro}}$ ( $\text{cm}^3/\text{g}$ ) <sup>a</sup> | 0.196              | 0.155       | 0.128       | 0.116        | 0.088        |

<sup>a</sup> Calculated by t-plot method.

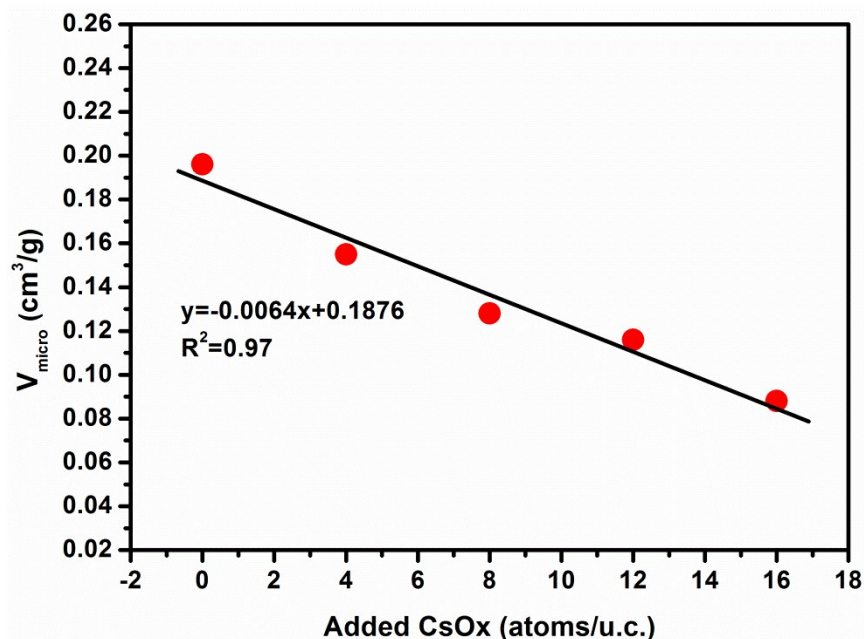

**Fig. S1.** The  $V_{\text{micro}}$  of the CsX-c modified with different cesium oxide amount as function of the cesium oxide loading amount.

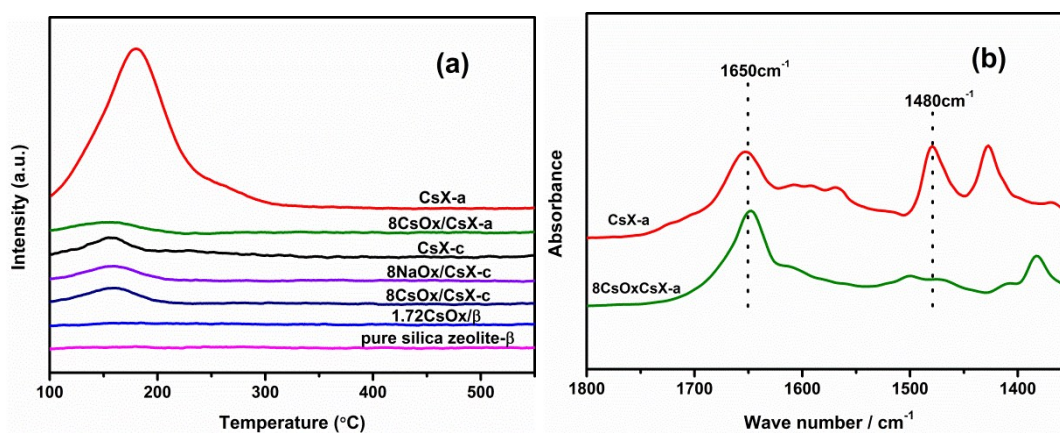

**Fig. S2.** (a)  $\text{NH}_3$ -TPD and (b) FT-IR of adsorbed  $\text{NH}_3$  of the indicated catalysts.

The acid properties of the catalysts were studied by  $\text{NH}_3$ -TPD and FT-IR of adsorbed  $\text{NH}_3$ , and the results were shown in Fig. S2, in which the data of CsX-a and CsX-c were taken from our previous work.<sup>1</sup> The  $\text{NH}_3$ -TPD of the alkali modified CsX-c is similar to that of CsX-c, indicating that the introduction of alkali oxides had little effect on the acid sites of CsX-c, which was consistent with the conclusion of Alabi et al.<sup>2</sup> However, when CsX-a was modified with cesium oxide, both the desorption temperature and area of the  $\text{NH}_3$  decreased obviously, and the acid properties of 8CsOx/CsX-a was similar to that of CsX-c. In our previous work, the

acid properties of NaX and CsX with different cesium exchanged degree (ED) were studied.<sup>1</sup> It found that Brønsted acidic hydroxyl group can be detected on NaX which could be removed by the cesium ion exchange process, and the Brønsted acid sites will disappeared entirely when the ED reaching 45.9 %. The acid properties of CsX-a and 8CsOx/CsX-a was further studied by FT-IR of adsorbed NH<sub>3</sub> (Fig. S2(b)). The absorption bands at 1650 cm<sup>-1</sup> was assigned to the asymmetric deformation mode of NH<sub>3</sub> molecules adsorbed on Lewis acid sites, and 1480 cm<sup>-1</sup> was attributed to the ammonium ions formed by proton transfer from Brønsted acid to ammonia molecules.<sup>3</sup> As shown in Fig S2(b), the Brønsted acid sites can be detected on CsX-a (ED=21.8%) as the cesium ED is lower. With the introduction of cesium oxide, the absorption band at 1480 cm<sup>-1</sup> was almost disappeared on 8CsOx/CsX-a, indicating that the introduction of cesium oxide will remove the Brønsted acid sites which was consistent with the report says.<sup>4</sup> And the disappearance of the Brønsted acid sites should account for the weakened acid properties of CsX-a when modified with cesium oxide (Fig. S2(a)). As no Brønsted acid sites was detected on CsX-c (EB=45.9 %),<sup>1</sup> and the NH<sub>3</sub>-TPD of alkali oxide modified CsX-c is similar to that of CsX-c (Fig. S2(a)), suggesting the Lewis acid sites of CsX was little influenced by the loaded alkali oxides. What's more, no NH<sub>3</sub> desorption peak was detected on both pure silicon zeolite β and 1.72CsOx/β, indicating that almost no acid sites on pure silicon zeolite β and no acid base sites will be introduced by loading cesium oxide.

**Table S2** The composition and base properties of the indicated catalysts.

| Cstalyt           | composition <sup>a</sup>                                                                                 | Amount of O <sup>δ-</sup> in the | Amount of                                         | S <sub>int</sub> <sup>c</sup> | δ <sub>o</sub> <sup>c</sup> |
|-------------------|----------------------------------------------------------------------------------------------------------|----------------------------------|---------------------------------------------------|-------------------------------|-----------------------------|
|                   |                                                                                                          | zeolite framework<br>(mmol/g)    | desorbed CO <sub>2</sub><br>(mmol/g) <sup>b</sup> |                               |                             |
| Na <sub>2</sub> O | Na <sub>2</sub> O                                                                                        | -                                | -                                                 | 1.3667                        | -0.8091                     |
| K <sub>2</sub> O  | K <sub>2</sub> O                                                                                         | -                                | -                                                 | 0.9723                        | -0.8922                     |
| Cs <sub>2</sub> O | Cs <sub>2</sub> O                                                                                        | -                                | -                                                 | 0.7420                        | -0.9406                     |
| CsX-a             | Na <sub>68.9</sub> Cs <sub>19.3</sub> Al <sub>88.2</sub> Si <sub>103.8</sub> O <sub>384</sub>            | 5.66                             | 0.0647                                            | 3.1560                        | -0.4128                     |
| CsX-b             | Na <sub>59.6</sub> Cs <sub>28.4</sub> Al <sub>88</sub> Si <sub>104</sub> O <sub>384</sub>                | 5.31                             | 0.1126                                            | 3.1183                        | -0.4324                     |
| CsX-c             | Na <sub>47.6</sub> Cs <sub>40.4</sub> Al <sub>88</sub> Si <sub>104</sub> O <sub>384</sub>                | 4.91                             | 0.1700                                            | 3.0670                        | -0.4511                     |
| 8CsOx/CsX-a       | Na <sub>68.9</sub> Cs <sub>27.3</sub> Al <sub>88.2</sub> Si <sub>103.8</sub> O <sub>388</sub>            | 5.28                             | 0.1557                                            | 3.0759                        | -0.4493                     |
| 8CsOx/CsX-b       | Na <sub>59.6</sub> Cs <sub>36.4</sub> Al <sub>88</sub> Si <sub>104</sub> O <sub>388</sub>                | 4.97                             | 0.2049                                            | 3.0398                        | -0.4569                     |
| 4CsOx/CsX-c       | Na <sub>47.6</sub> Cs <sub>44.4</sub> Al <sub>88</sub> Si <sub>104</sub> O <sub>386</sub>                | 4.91                             | 0.2269                                            | 3.0283                        | -0.4593                     |
| 8CsOx/CsX-c       | Na <sub>47.6</sub> Cs <sub>48.4</sub> Al <sub>88</sub> Si <sub>104</sub> O <sub>388</sub>                | 4.62                             | 0.3394                                            | 2.9907                        | -0.4672                     |
| 12CsOx/CsX-c      | Na <sub>47.6</sub> Cs <sub>52.4</sub> Al <sub>88</sub> Si <sub>104</sub> O <sub>390</sub>                | 4.49                             | 0.4459                                            | 2.9543                        | -0.4749                     |
| 16CsOx/CsX-c      | Na <sub>47.6</sub> Cs <sub>56.4</sub> Al <sub>88</sub> Si <sub>104</sub> O <sub>392</sub>                | 4.37                             | 0.4956                                            | 2.9189                        | -0.4823                     |
| 8NaOx/CsX-c       | Na <sub>55.6</sub> Cs <sub>40.4</sub> Al <sub>88</sub> Si <sub>104</sub> O <sub>388</sub>                | 4.85                             | 0.1995                                            | 3.0233                        | -0.4603                     |
| 8KOx/CsX-c        | Na <sub>47.6</sub> K <sub>8</sub> Cs <sub>40.4</sub> Al <sub>88</sub> Si <sub>104</sub> O <sub>388</sub> | 4.81                             | 0.2672                                            | 3.0051                        | -0.4642                     |

<sup>a</sup> CsX-a, CsX-b and CsX-c were obtained by XRF, the alkali oxide modified catalysts were calculated by plus the unite cell composition of the host zeolite and the amount of the loaded alkali oxides, the added alkali oxides were calculated in the form of Na<sub>2</sub>O, K<sub>2</sub>O and Cs<sub>2</sub>O;

<sup>b</sup> Calculated by the amount of desorbed CO<sub>2</sub> in CO<sub>2</sub>-TPD before 400°C;

<sup>c</sup> S<sub>int</sub> and δ<sub>o</sub> were calculated according to W. J. Mortier.<sup>5</sup>

**Table S3** The reaction behaviors of alkylation of toluene with methanol over the indicated catalysts.\*

| Components                                  | Molar flow rates of different components (mmol/h) |                                 |        |        |             |             |              |              |             |            |             |             |                      |                   |
|---------------------------------------------|---------------------------------------------------|---------------------------------|--------|--------|-------------|-------------|--------------|--------------|-------------|------------|-------------|-------------|----------------------|-------------------|
|                                             | Feed                                              | Output over different catalysts |        |        |             |             |              |              |             |            |             |             |                      |                   |
|                                             |                                                   | CsX-a                           | CSX-b  | CSX-c  | 4CsOx/CsX-c | 8CsOx/CsX-c | 12CsOx/CsX-c | 16CsOx/CsX-c | 8NaOx/CsX-c | 8KOx/CsX-c | 8CsOx/CsX-a | 8CsOx/CsX-b | pure silicon $\beta$ | 1.72CsOx/ $\beta$ |
| Carbon monoxide                             | —                                                 | 0.266                           | 0.618  | 4.520  | 10.975      | 14.627      | 17.298       | 19.433       | 8.910       | 11.302     | 7.158       | 10.694      | 0.008                | 0.013             |
| Carbon dioxide                              | —                                                 | 0.045                           | 0.021  | 0.082  | 0.105       | 0.293       | 0.153        | 0.190        | 0.067       | 0.100      | 0.144       | 0.115       | 0.003                | 0.003             |
| Methane                                     | —                                                 | 0.633                           | 0.030  | 0.029  | 0.112       | 0.142       | 0.245        | 0.150        | 0.087       | 0.098      | 0.043       | 0.082       | 0.057                | 0.004             |
| C <sub>2</sub> -C <sub>5</sub>              | —                                                 | 0.156                           | 0.002  | 0.006  | 0.023       | 0.049       | 0.054        | 0.026        | 0.012       | 0.015      | 0.006       | 0.012       | 0.043                | 0.022             |
| DME                                         | —                                                 | 3.687                           | 2.145  | 1.420  | 0.606       | 0.349       | 0.203        | 0.128        | 0.542       | 0.566      | 0.878       | 0.514       | 0.184                | 0.052             |
| methanol                                    | 25.643                                            | 15.979                          | 20.326 | 17.097 | 10.661      | 7.411       | 5.645        | 3.872        | 13.665      | 10.860     | 15.238      | 11.855      | 24.938               | 25.413            |
| benzene                                     | —                                                 | 0.004                           | 0.001  | 0.008  | 0.004       | 0.004       | 0.003        | 0.004        | 0.004       | 0.004      | 0.005       | 0.004       | 0.000                | 0.000             |
| Toluene                                     | 12.821                                            | 11.511                          | 12.485 | 11.925 | 11.021      | 10.405      | 10.656       | 11.128       | 11.252      | 10.948     | 11.559      | 11.000      | 12.647               | 12.820            |
| Ethylbenzene                                | —                                                 | 0.010                           | 0.034  | 0.408  | 1.594       | 2.069       | 1.897        | 1.418        | 1.299       | 1.605      | 0.822       | 1.515       | 0.000                | 0.000             |
| Xylene                                      | —                                                 | 0.952                           | 0.187  | 0.013  | 0.005       | 0.002       | 0.004        | 0.005        | 0.002       | 0.002      | 0.009       | 0.002       | 0.064                | 0.001             |
| Styrene                                     | —                                                 | 0.011                           | 0.087  | 0.446  | 0.203       | 0.137       | 0.043        | 0.029        | 0.227       | 0.195      | 0.384       | 0.218       | 0.000                | 0.000             |
| C <sub>9</sub> <sup>+</sup>                 | —                                                 | 0.245                           | 0.027  | 0.046  | 0.081       | 0.173       | 0.144        | 0.207        | 0.064       | 0.091      | 0.047       | 0.079       | 0.093                | 0.004             |
| Total                                       | 38.464                                            | 33.498                          | 35.964 | 36.001 | 35.390      | 35.660      | 36.345       | 36.591       | 36.129      | 35.785     | 36.293      | 36.089      | 38.036               | 38.331            |
| [CH <sub>2</sub> O]                         | —                                                 | 0.332                           | 0.759  | 5.457  | 12.878      | 17.125      | 19.391       | 21.070       | 10.503      | 13.202     | 8.509       | 12.541      | 0.011                | 0.016             |
| [H]                                         | —                                                 | 1.285                           | 2.796  | 20.119 | 47.915      | 64.088      | 73.685       | 81.386       | 38.959      | 49.208     | 31.622      | 46.701      | 0.041                | 0.062             |
| X <sub>toluene</sub> (mol%)                 | —                                                 | 10.220                          | 2.622  | 6.992  | 14.038      | 18.845      | 16.886       | 13.203       | 12.241      | 14.611     | 9.843       | 14.202      | 1.358                | 0.010             |
| X <sub>methanol</sub> (mol%)                | —                                                 | 8.931                           | 4.002  | 22.253 | 53.703      | 68.377      | 76.399       | 83.899       | 42.487      | 53.236     | 33.728      | 49.759      | 1.316                | 0.489             |
| Y <sub>ST+EB</sub> (mol%)                   | —                                                 | 0.163                           | 0.939  | 6.667  | 14.022      | 17.204      | 15.130       | 11.287       | 11.902      | 14.035     | 9.408       | 13.511      | 0.003                | 0.004             |
| Y <sub>CO+CO<sub>2</sub></sub> (mol%)       | —                                                 | 1.212                           | 2.492  | 17.948 | 43.208      | 58.181      | 68.055       | 76.524       | 35.007      | 44.465     | 28.477      | 42.153      | 0.039                | 0.060             |
| ST/EB (mol/mol)                             | —                                                 | 1.176                           | 2.591  | 1.094  | 0.128       | 0.066       | 0.022        | 0.020        | 0.175       | 0.121      | 0.467       | 0.144       | 0.000                | 0.000             |
| Y <sub>xylene</sub> (mol%)                  | —                                                 | 7.422                           | 1.460  | 0.105  | 0.041       | 0.018       | 0.029        | 0.039        | 0.018       | 0.017      | 0.072       | 0.016       | 0.501                | 0.010             |
| X <sub>(CH<sub>2</sub>O-to-ST)</sub> (mol%) | —                                                 | 6.315                           | 15.856 | 15.663 | 13.961      | 12.880      | 10.004       | 6.868        | 14.529      | 13.631     | 14.177      | 13.812      | 4.004                | 3.012             |
| Y <sub>[CH<sub>2</sub>O]</sub>              | —                                                 | 1.294                           | 2.961  | 21.281 | 50.219      | 66.782      | 75.620       | 82.167       | 40.958      | 51.483     | 33.181      | 48.908      | 0.041                | 0.062             |

\*Reaction

conditions:

T=430°C;

WHSV=2h<sup>-1</sup>;

n(toluene)/n(methanol)=1:2.

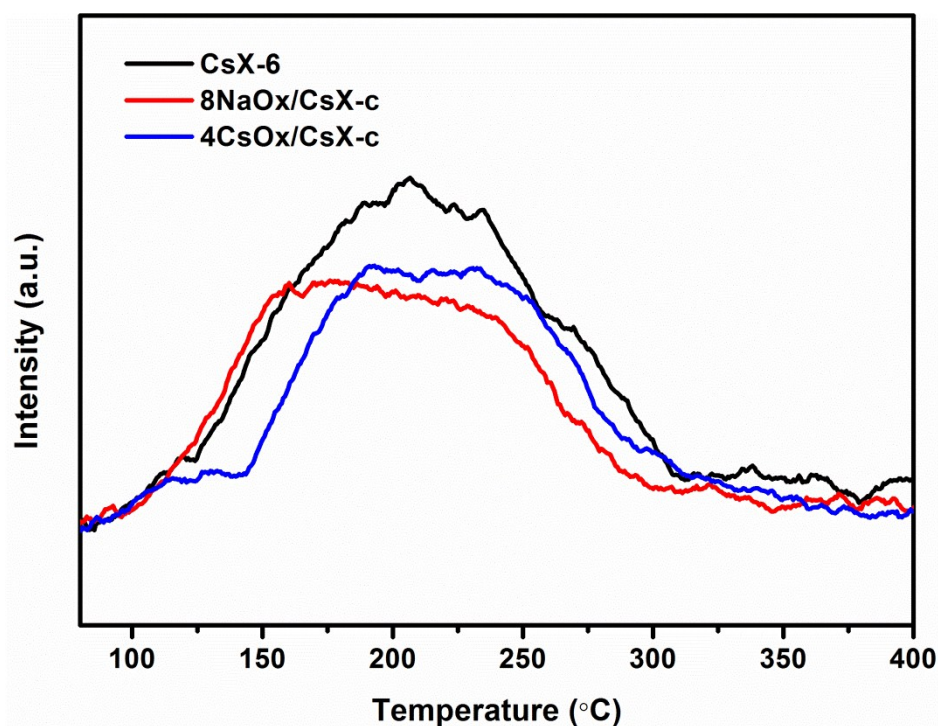

**Fig. S3** the comparison of CO<sub>2</sub>-TPD curves of the indicated catalysts with similar S<sub>int</sub>.

The CO<sub>2</sub>-TPD of CsX-6 (cesium exchanged degree is 59.2 %) was taken from our preceding paper to compare with 8NaOx/CsX-c and 4CsOx/CsX-c,<sup>1</sup> as the S<sub>int</sub> for the three catalysts is similar to each other.

## Reference

- 1 P. Li, Q. Han, X. Zhang, Y. Yuan, Y. Zhang, H. Guo, L. Xu and L. Xu, *Catal. Sci. Technol.*, 2018, **8**, 3346-3356.
- 2 W. O. Alabi, B. B. Tope, R. B. Jermy, A. M. Aitani, H. Hattori and S. S. Al-Khattaf, *Catal. Today*, 2014, 226, 117-123.
- 3 G. Martra, S. Coluccia, P. Davit, E. Gianotti, L. Marchese, H. Tsuji and H. Hattori, *Res.Chem. Intermed.*, 1999, 25, 77-93.
- 4 M. Hunger, U. Schenk and B. Burger, *J. Weitkamp, Angew. Chem. Int. Ed. Engl.*, 1997, 36, 2504-2506.
- 5 W. J. Mortier, *J. Catal.*, 1978, **55**, 138-145.
